# Supplementary material
Source: PubMed Central journal article supplement (PMC6336396)

# Representative data from a NP sample

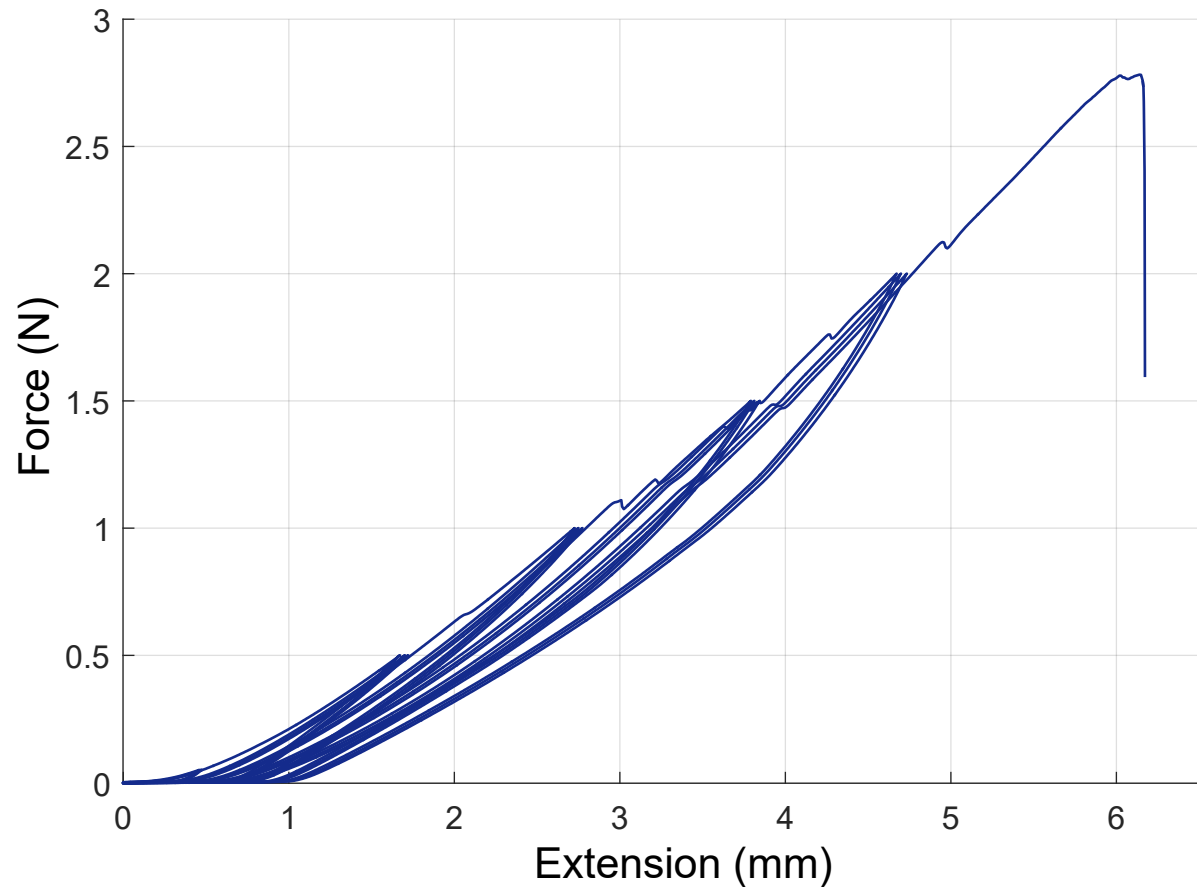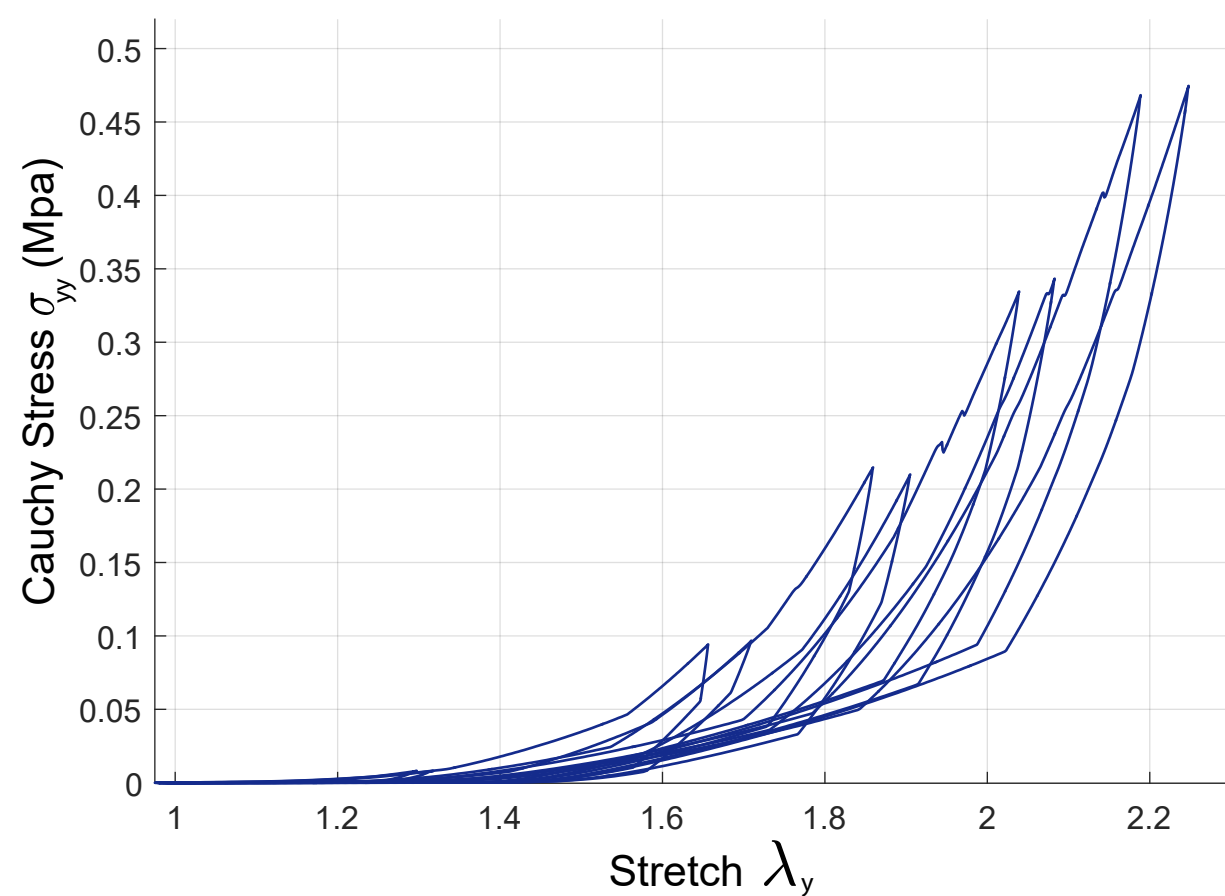

# Representative data from a d6 sample

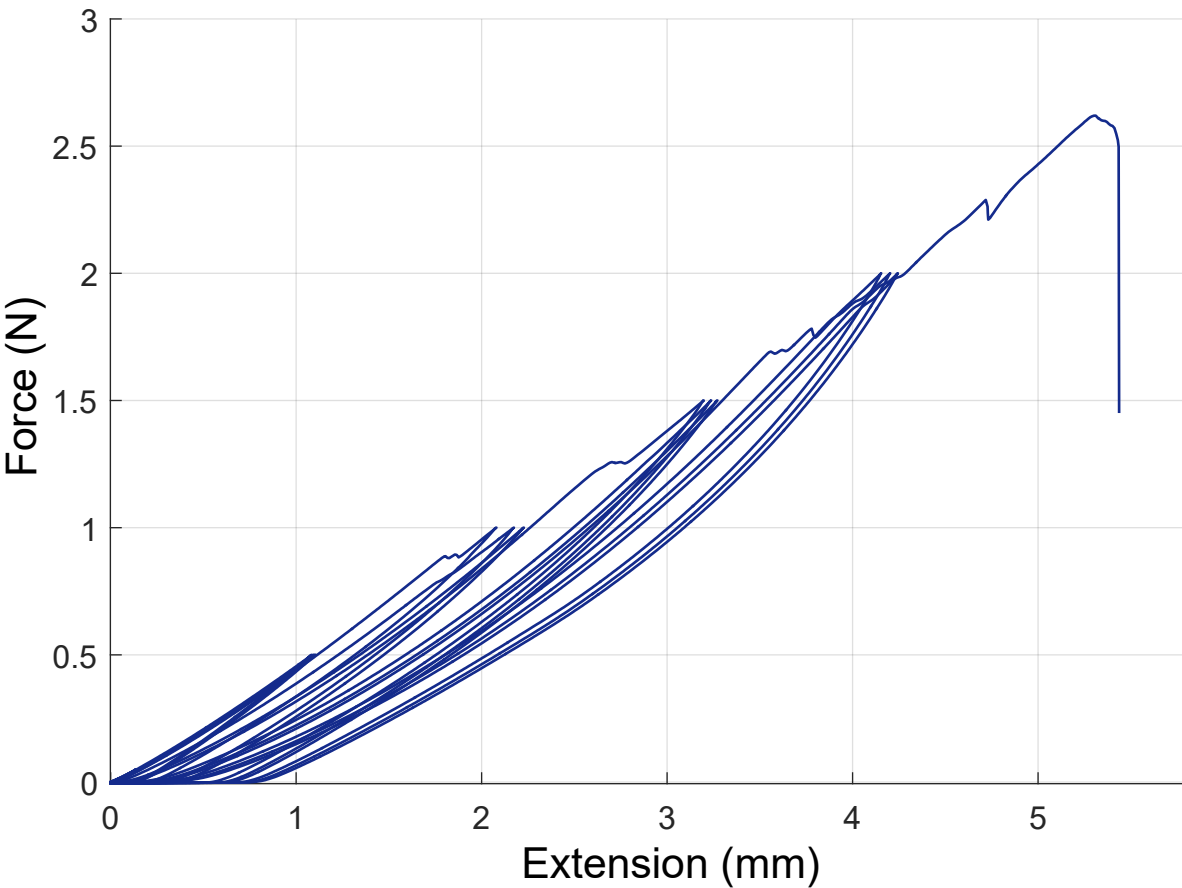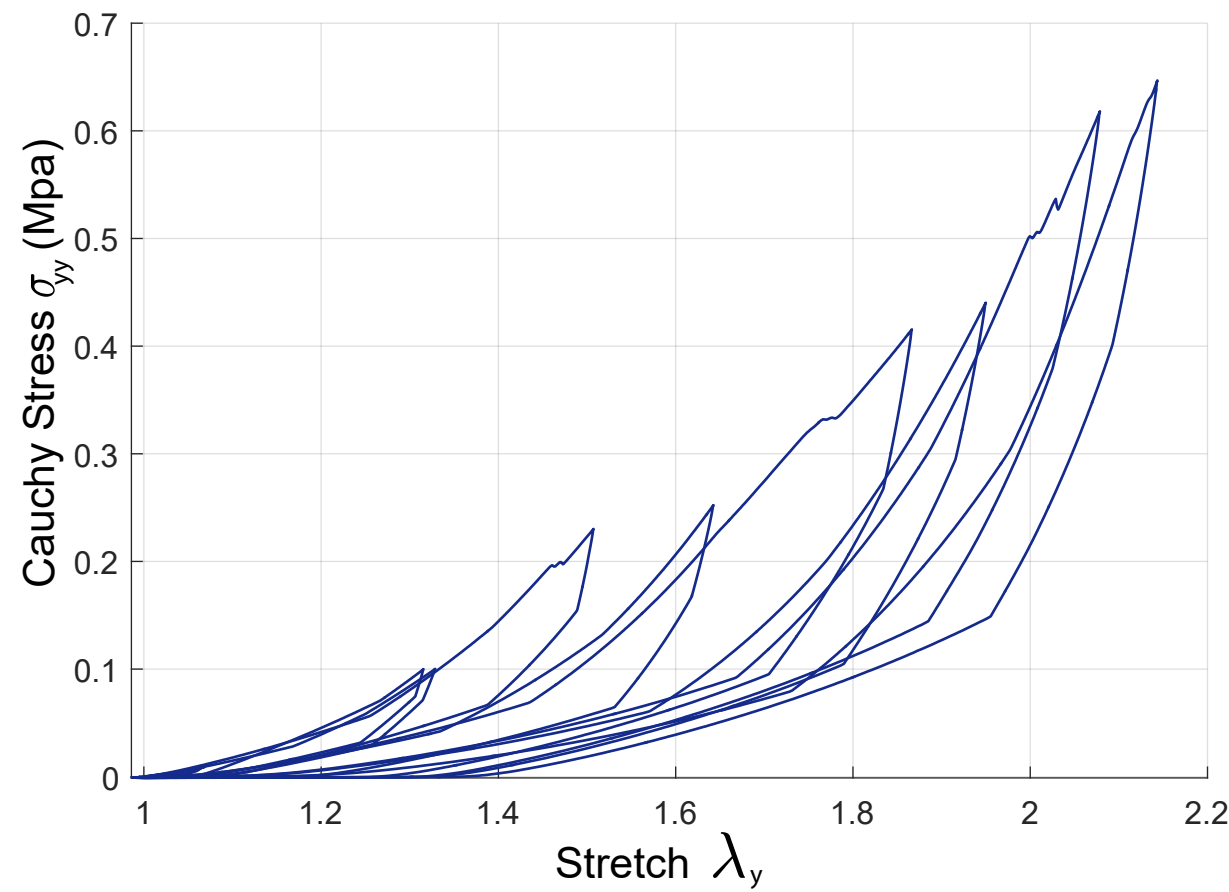

Representative data from a d12 sample

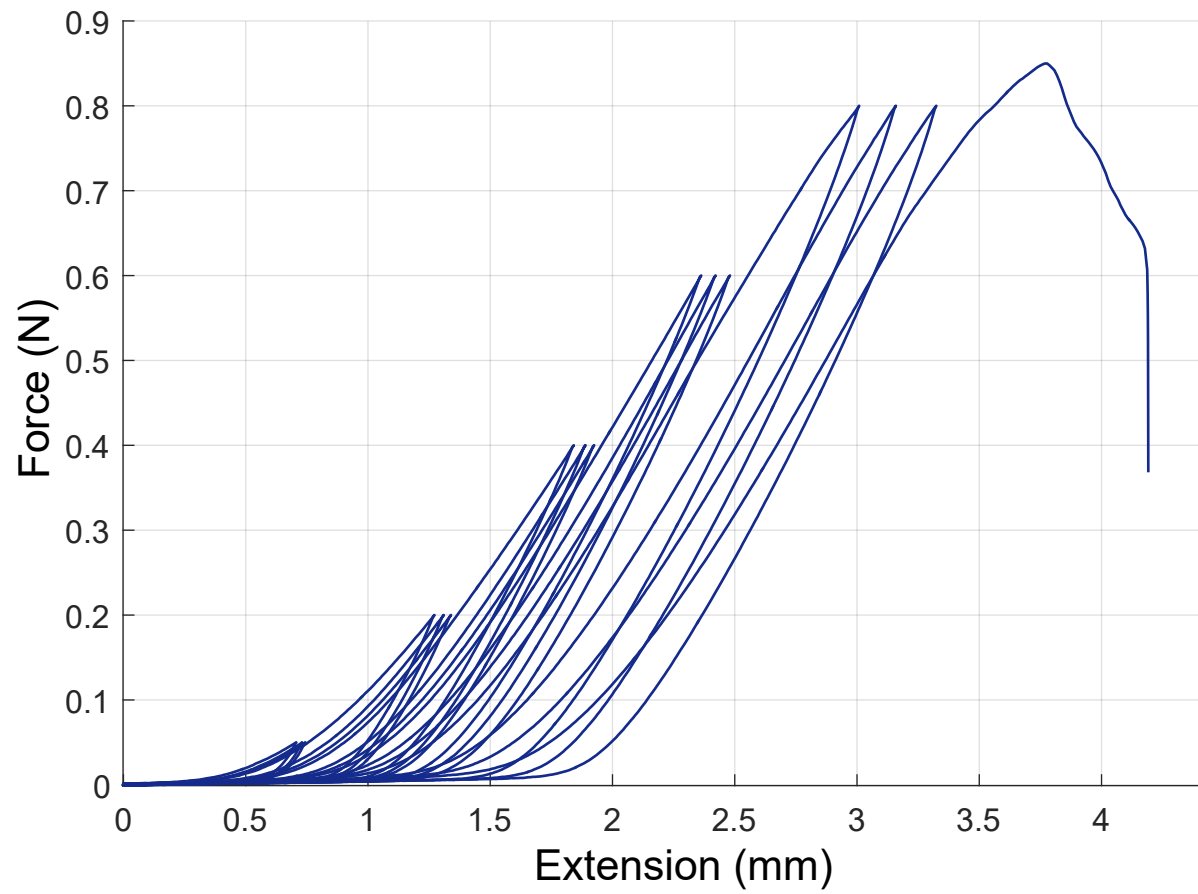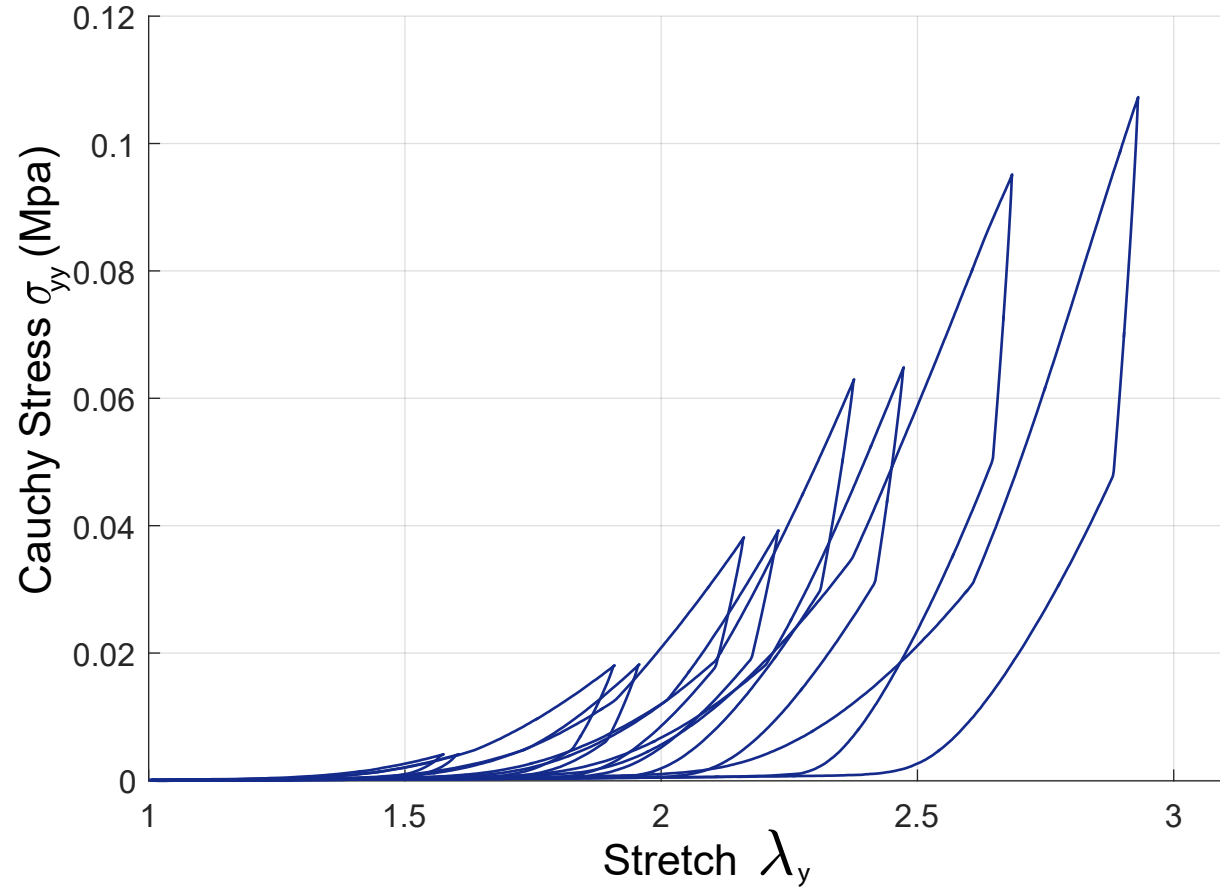

Representative data from a d15 sample

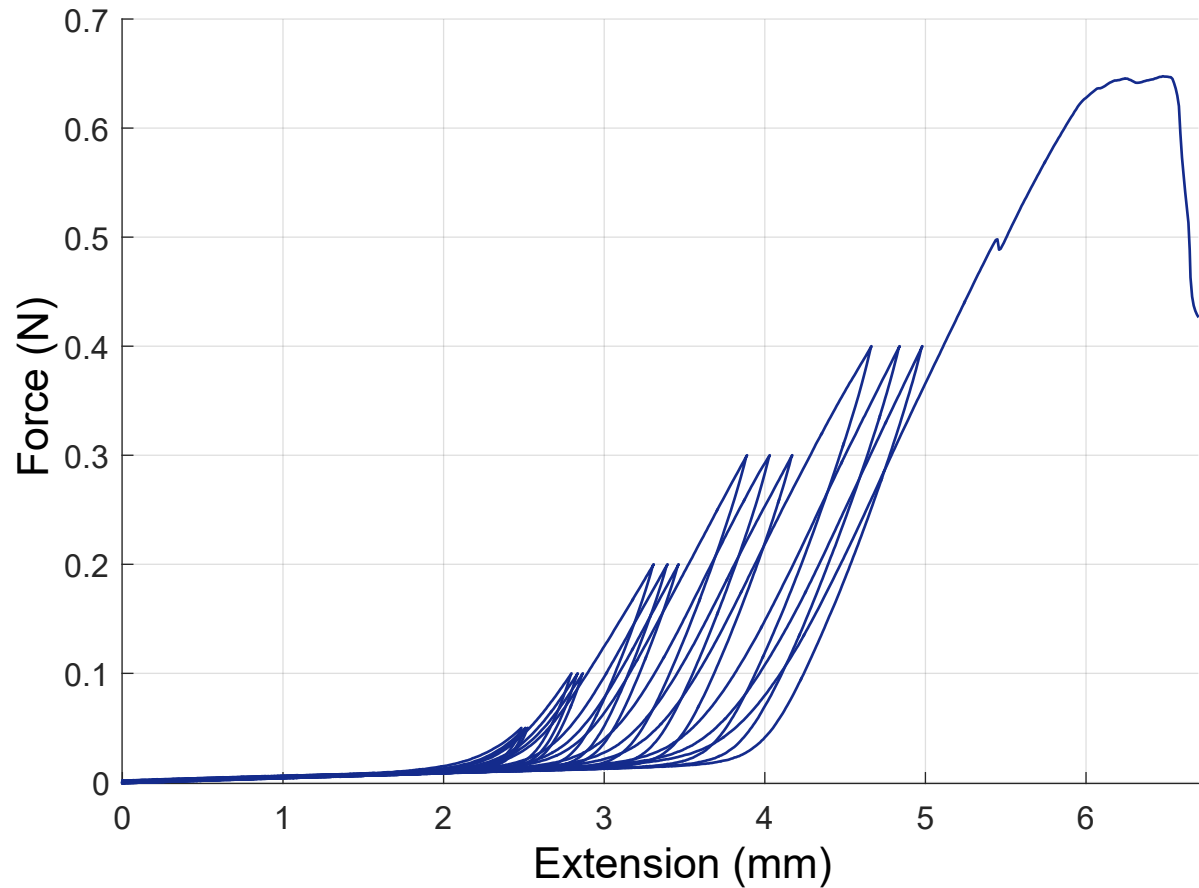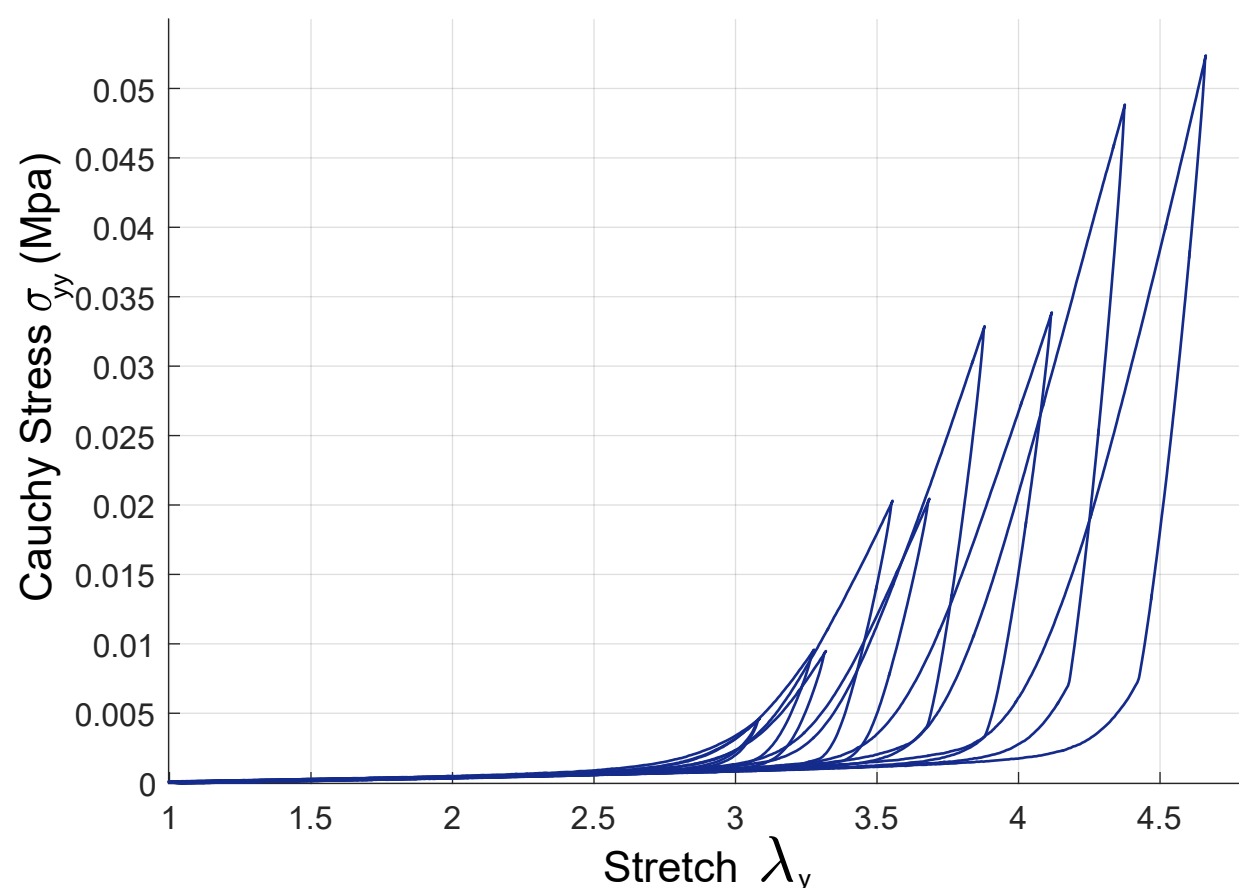

# Representative data from a d18 sample

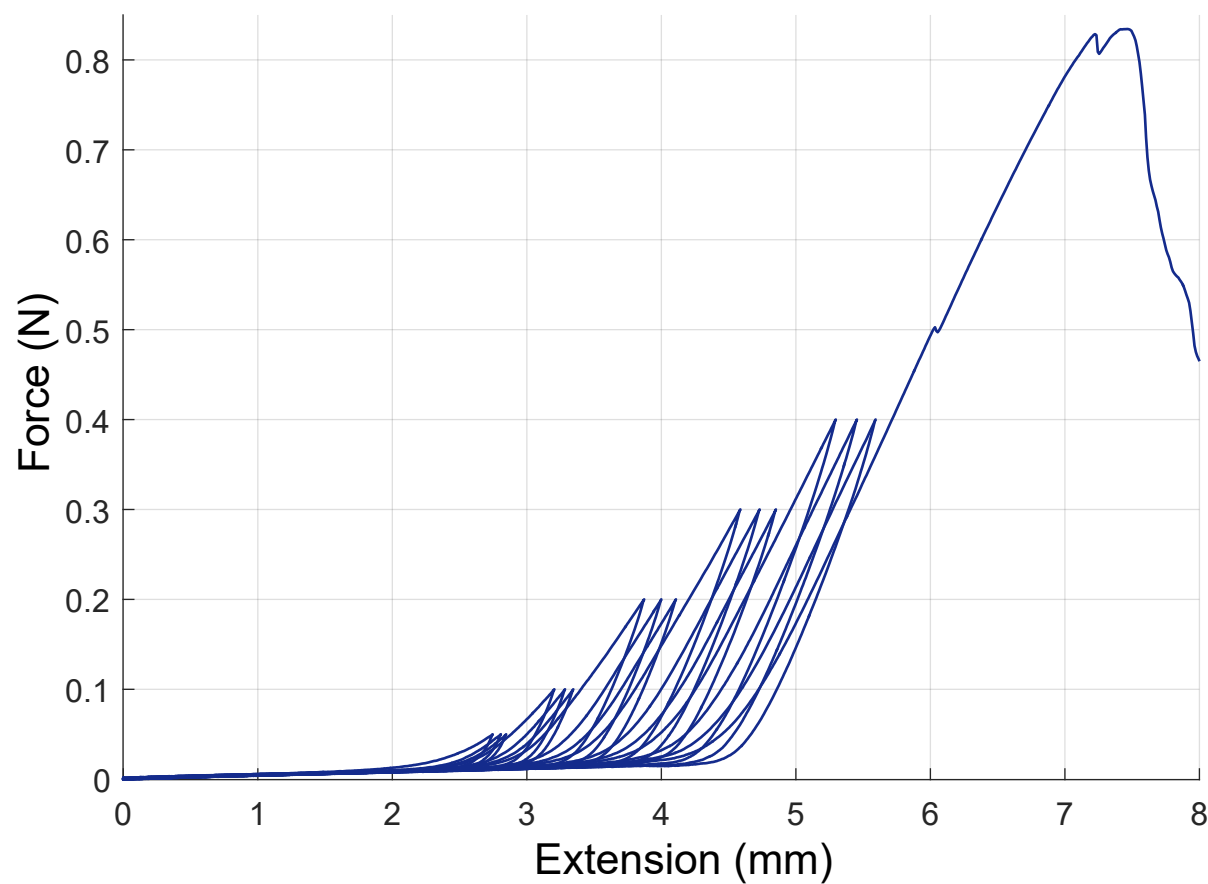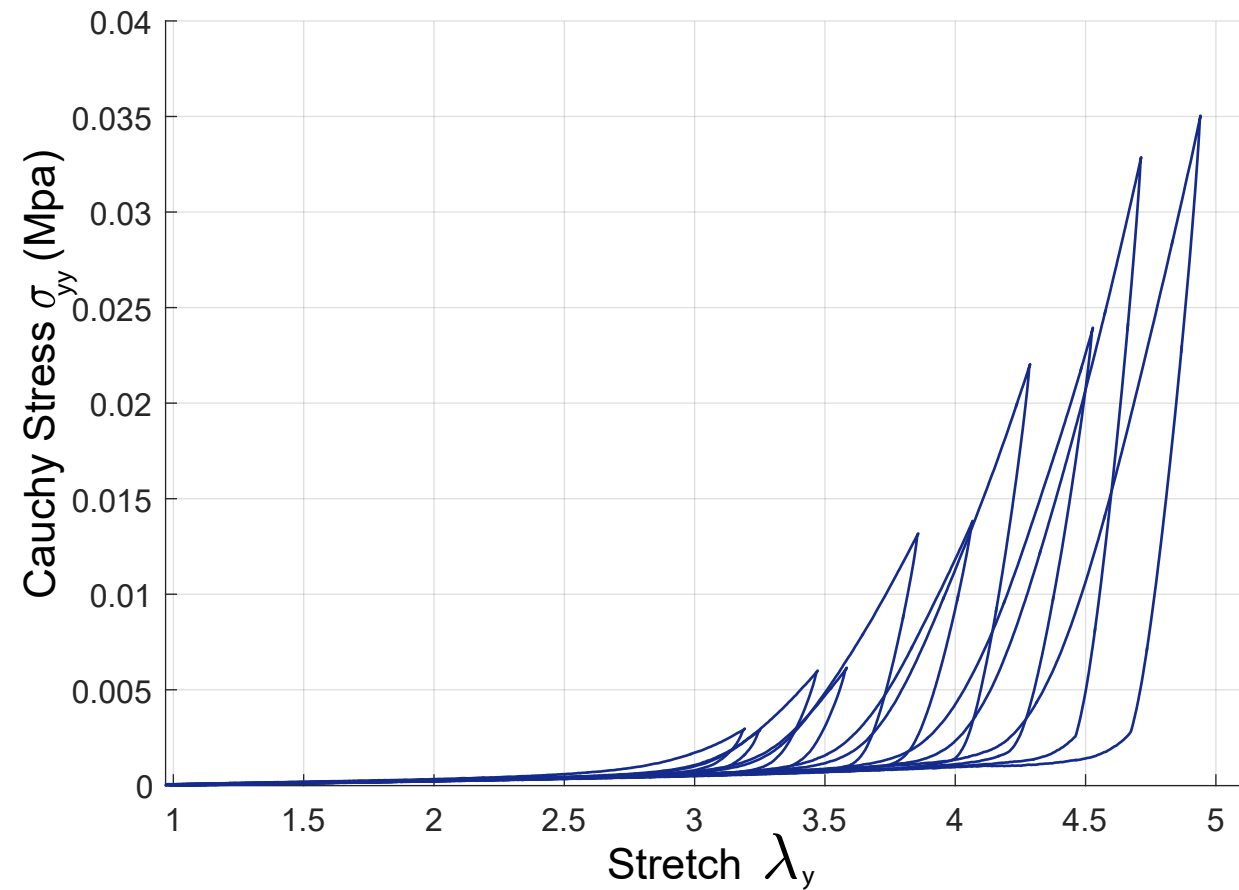

# Representative data from a LPSsham sample

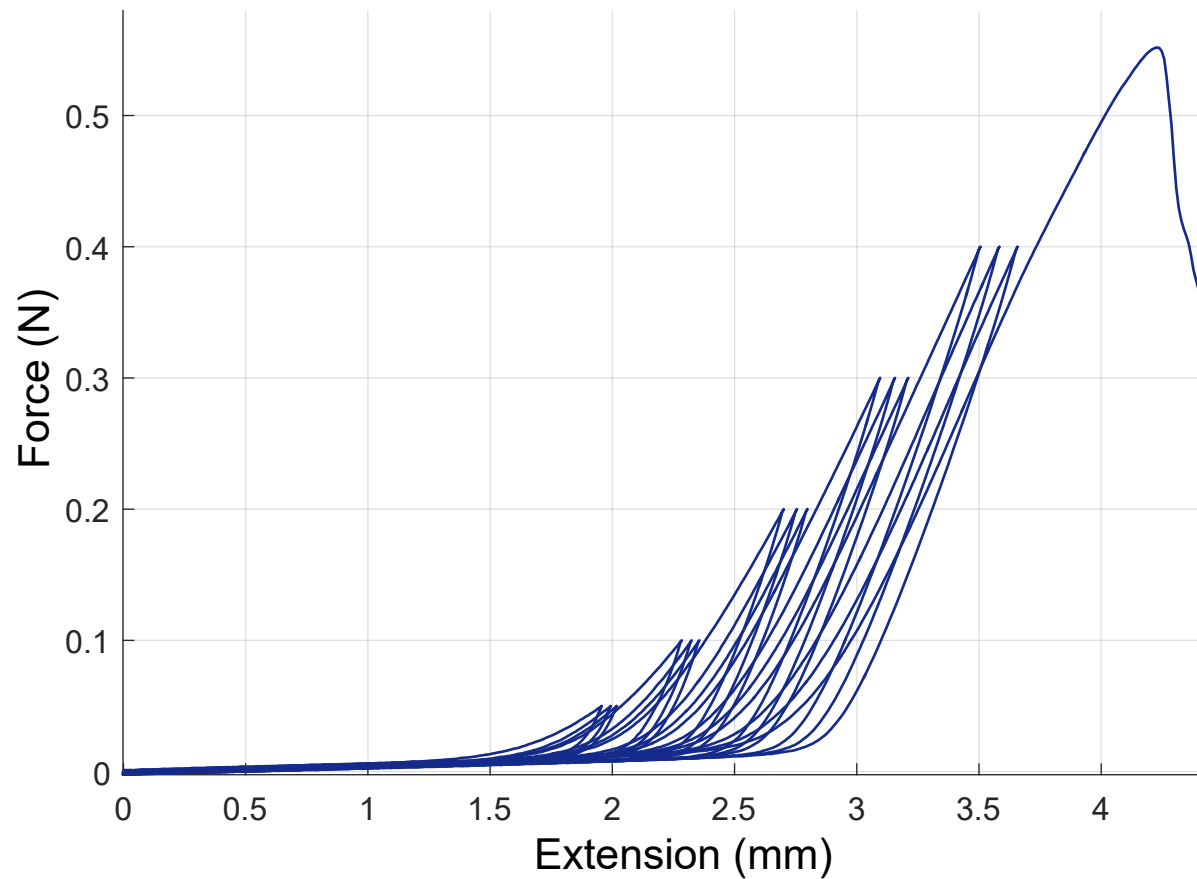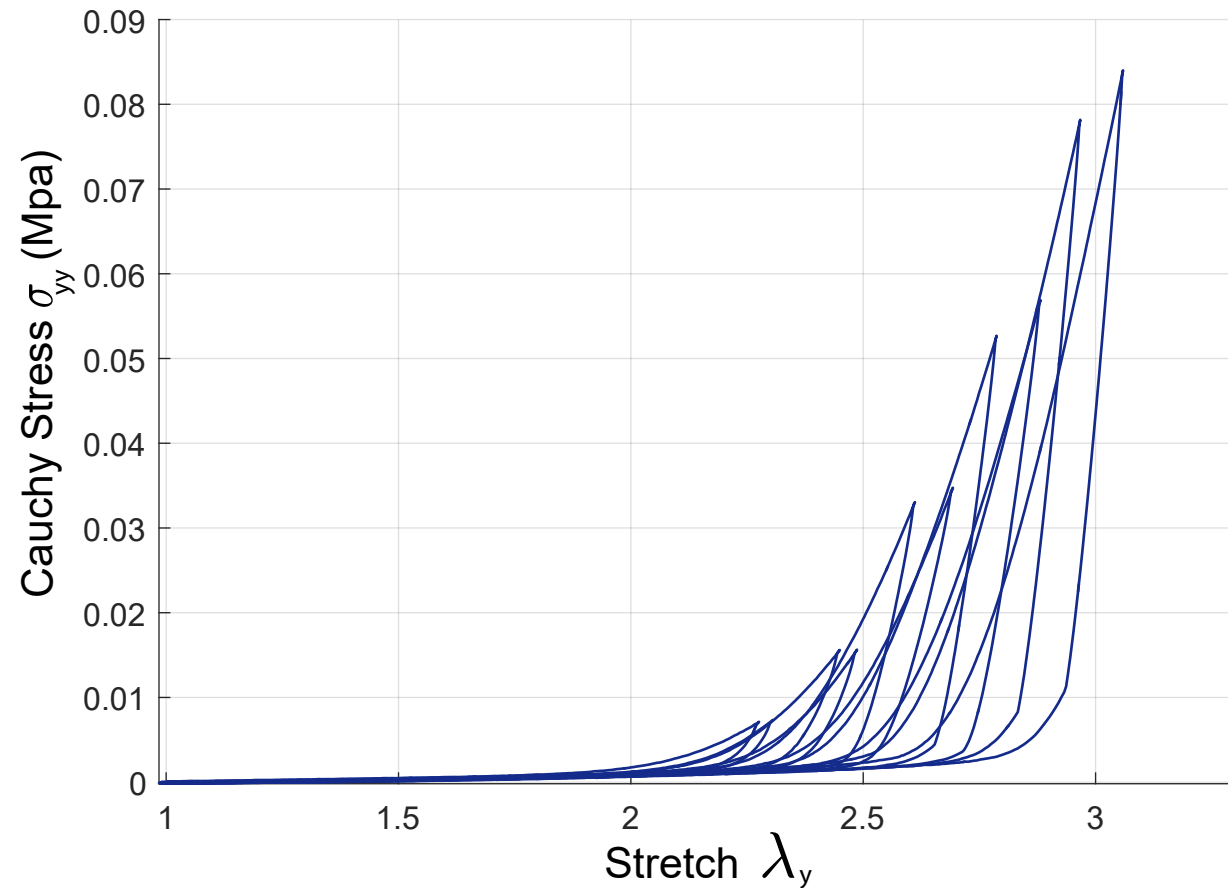

# Representative data from a RU486 sample

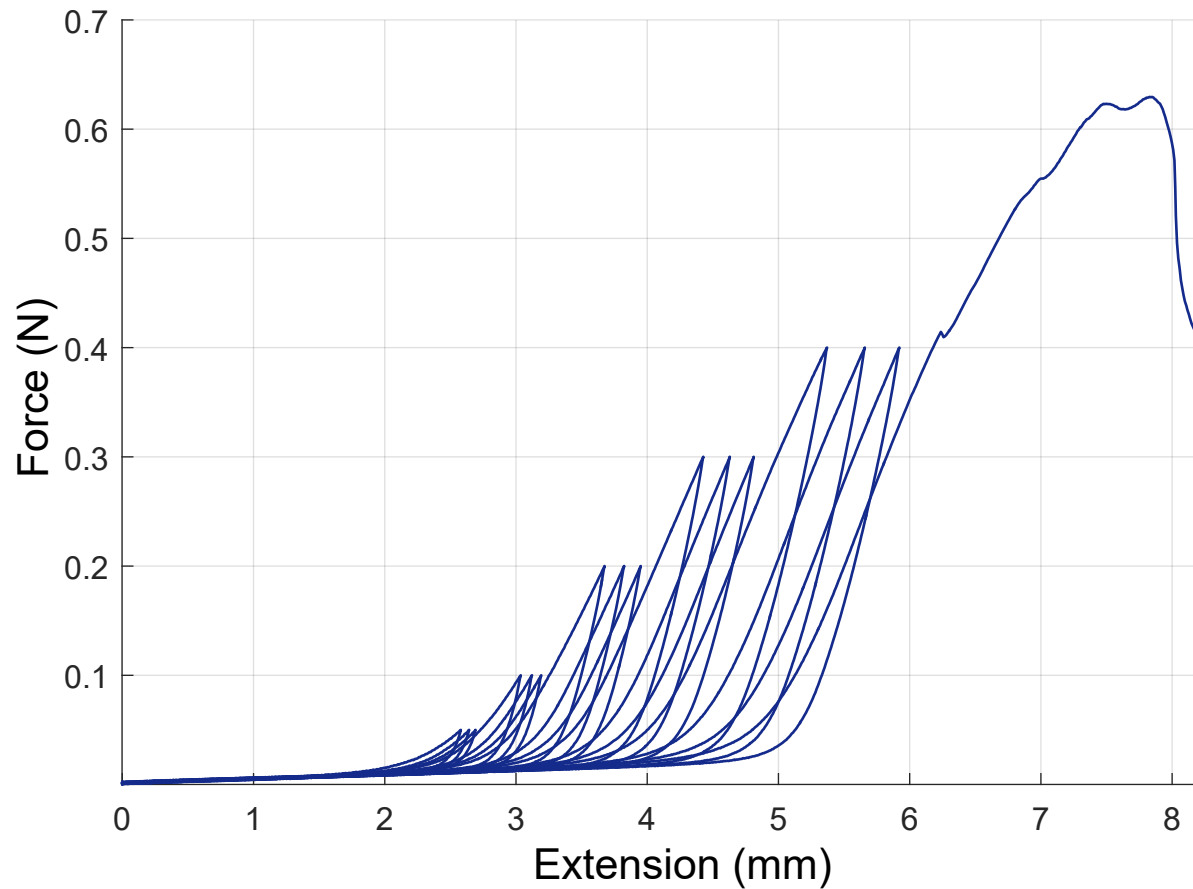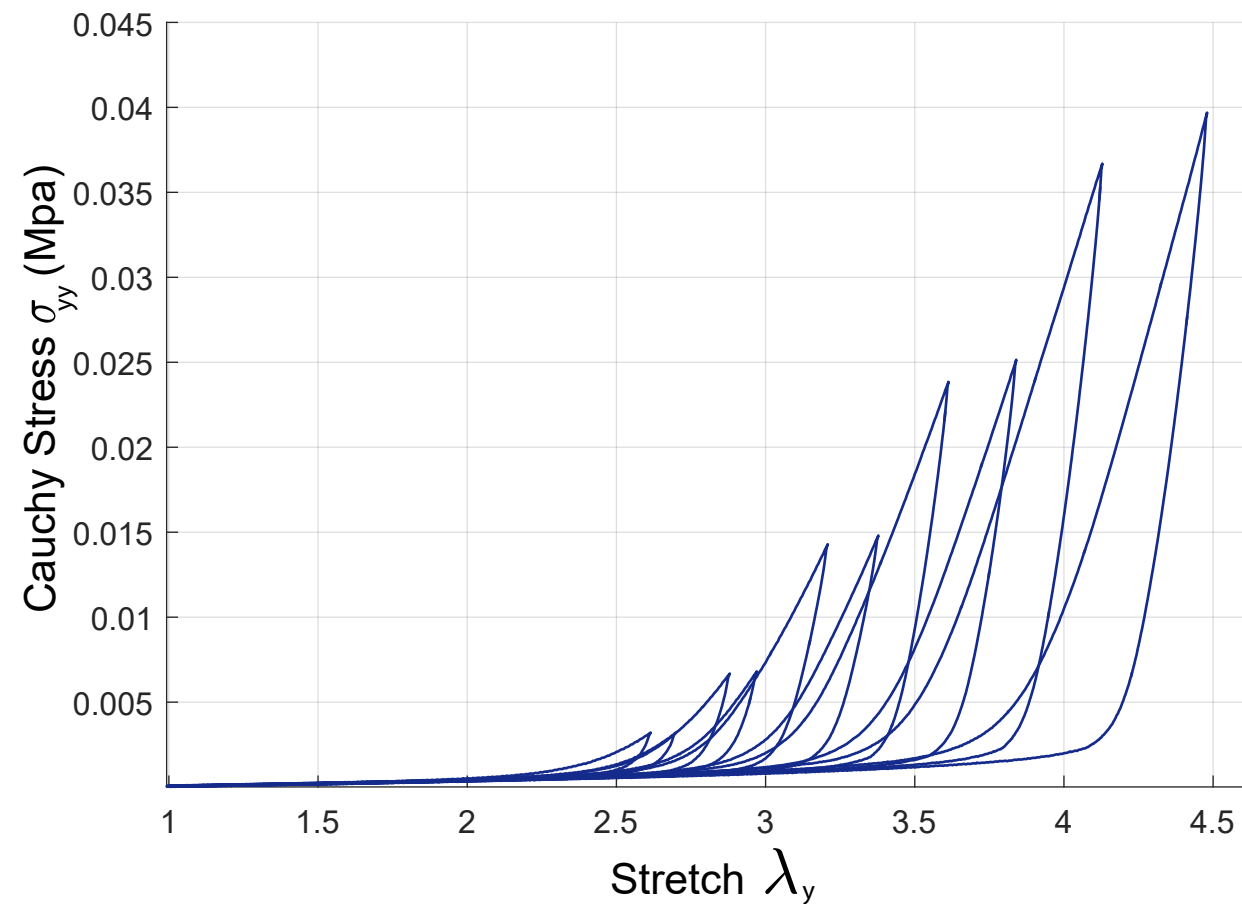

Supplement: NIHMS1508309-supplement-1.pdf [file NIHMS1508309-supplement-1.pdf]
